# Supplementary material for: Structure of an Acinetobacter Broad-Range Prophage Endolysin Reveals a C-Terminal α-Helix with the Proposed Role in Activity against Live Bacterial Cells
Source: Viruses. 2018 Jun 6;10(6):309. doi: 10.3390/v10060309 (PMC6024848; doi:10.3390/v10060309)
Supplement: Supplementary file 1 [file viruses-10-00309-s001.pdf]

Figure S1 Removal of the growth media components enhances the effect of AcLys on live bacterial cells

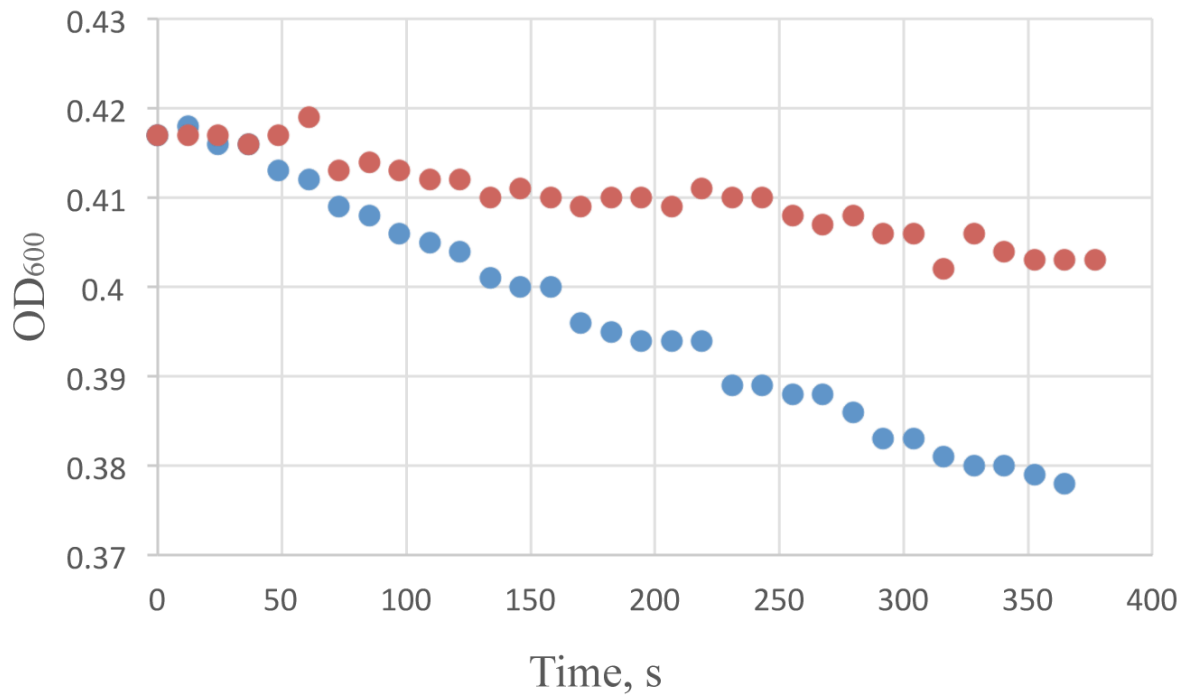

**Figure S1.** Bactericidal activity of AcLys (100 µg/mL) on viable *E. coli* CR63 cells washed with deionized water and resuspended in 20 mM Bis-Tris buffer pH 6.0 at 25 °C (red). Decrease of *E. coli* CR63 optical density at the same enzyme concentration, but in LB media is shown in red.

Figure S2 Temperature dependence of AcLys activity

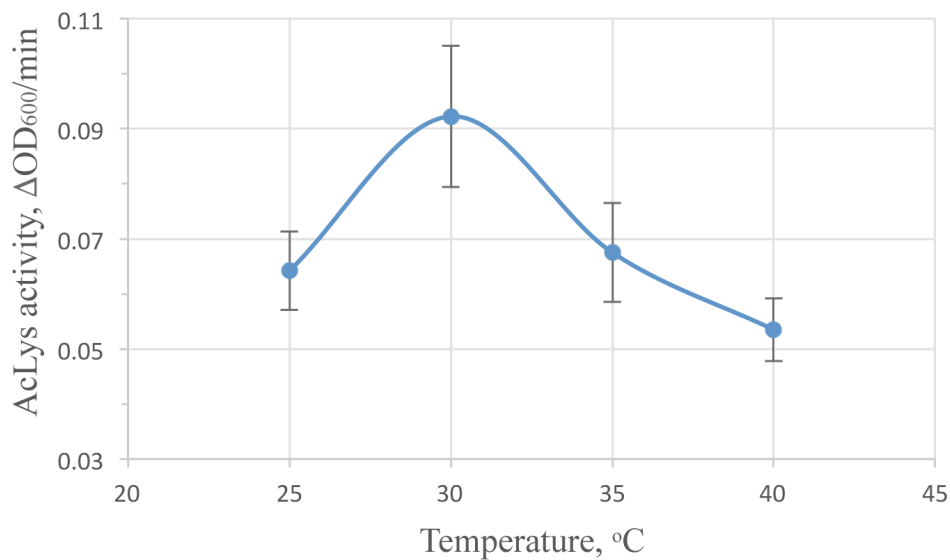

**Figure S2.** Temperature dependence of AcLys activity. The substrate - *E. coli* CR63 preliminary washed with deionized water and frozen at -70 °C. Reaction conditions 20 mM Bis-Tris (pH 6.0) AcLys 1 µg/mL. Activity was measured at the temperatures shown.

Figure S3. Dependence of AcLys activity on salt concentration

(A)

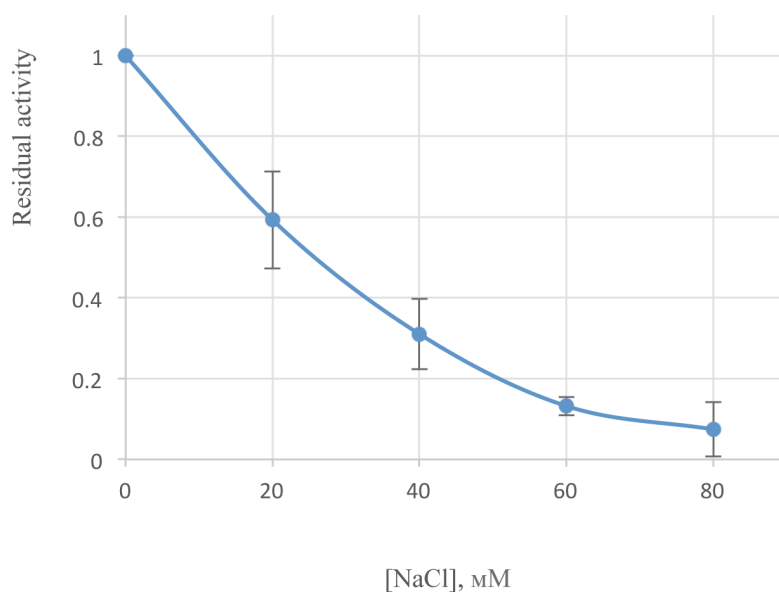

(B)

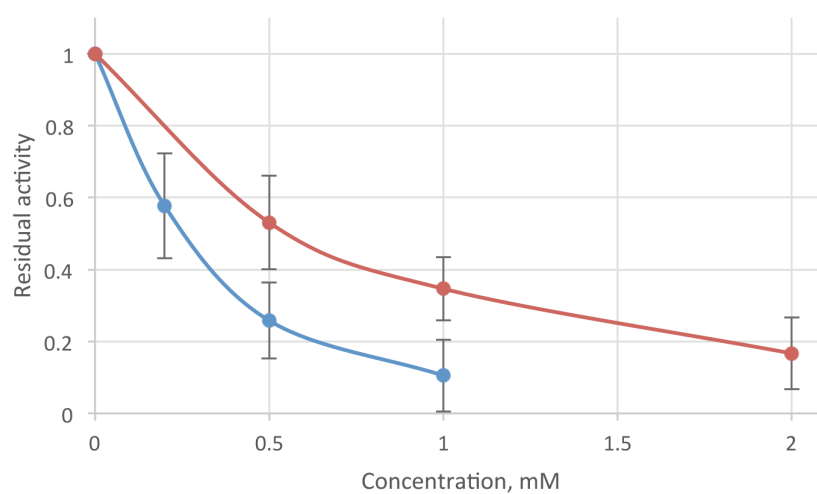

**Figure S3.** Dependence of AcLys activity on salt concentration. The substrate - *E. coli* CR63 preliminary washed with deionized water and frozen at -70 °C. AcLys concentration 10g/mL. Reaction run at 25 °C. A) Influence of NaCl. Reaction conditions 20 mM Bis-Tris (pH 6.0) supplied with indicated concentrations of NaCl; B) Influence of divalent cations. Reaction conditions 20 mM Bis-Tris (pH 6.0) supplied with indicated concentrations of MgCl<sub>2</sub> (red) and CaCl<sub>2</sub> (blue).
